# Supplementary material for: Low Energy Shock Wave Therapy Inhibits Inflammatory Molecules and Suppresses Prostatic Pain and Hypersensitivity in a Capsaicin Induced Prostatitis Model in Rats
Source: MDPI journal article supplement (doi:10.3390/ijms20194777), 2019-09-26
Supplement: s1 [file s1]

**Low energy shock wave therapy inhibits inflammatory molecules and suppresses  
prostatic pain and hypersensitivity in capsaicin induced prostatitis model in rats**

Hung-Jen Wang<sup>1,2</sup>, Pradeep Tyagi<sup>3</sup>, Yu-Ming Chen<sup>2</sup>, Michael B. Chancellor<sup>4</sup>, Yao-Chi  
Chuang<sup>1,2\*</sup>

## Western blot of prostate tissue extract expression at 3-day

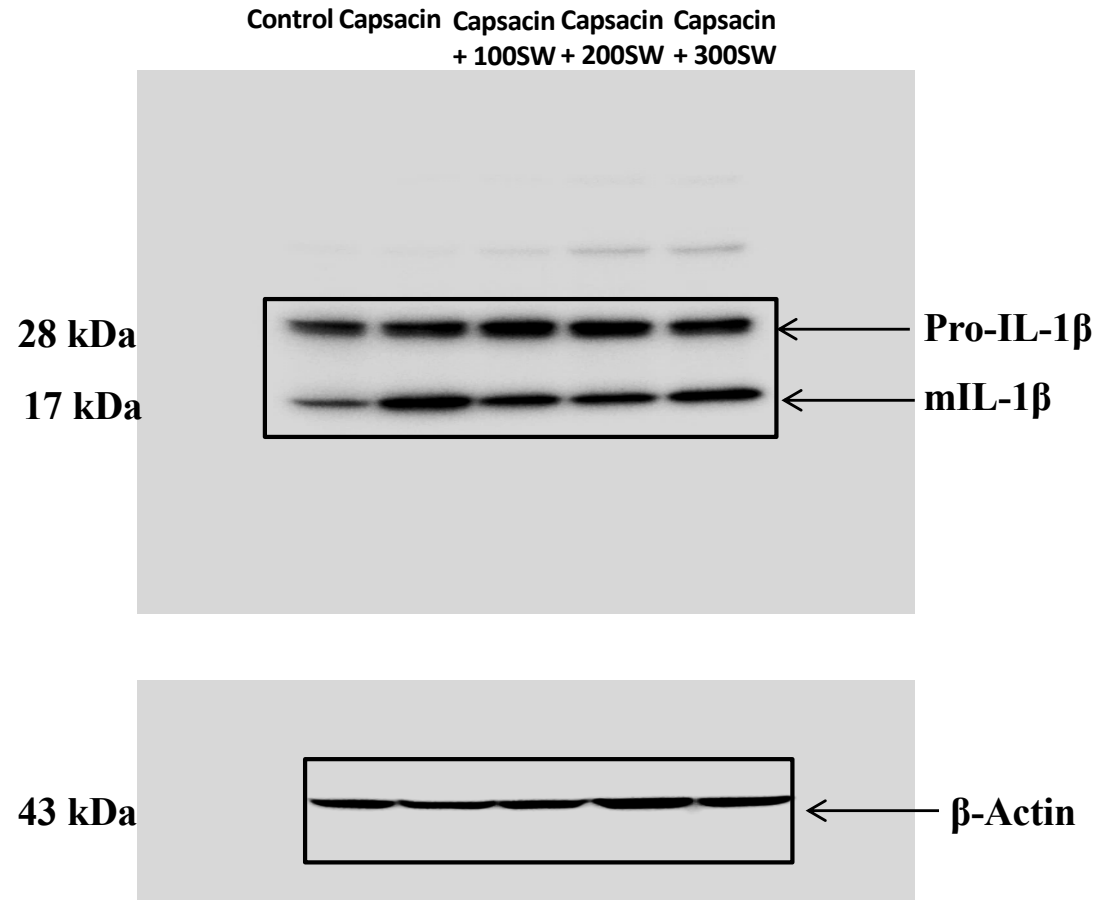

Supplementary figure S1a. Original blots for figure 4

## Western blot of prostate tissue extract expression at 3-day

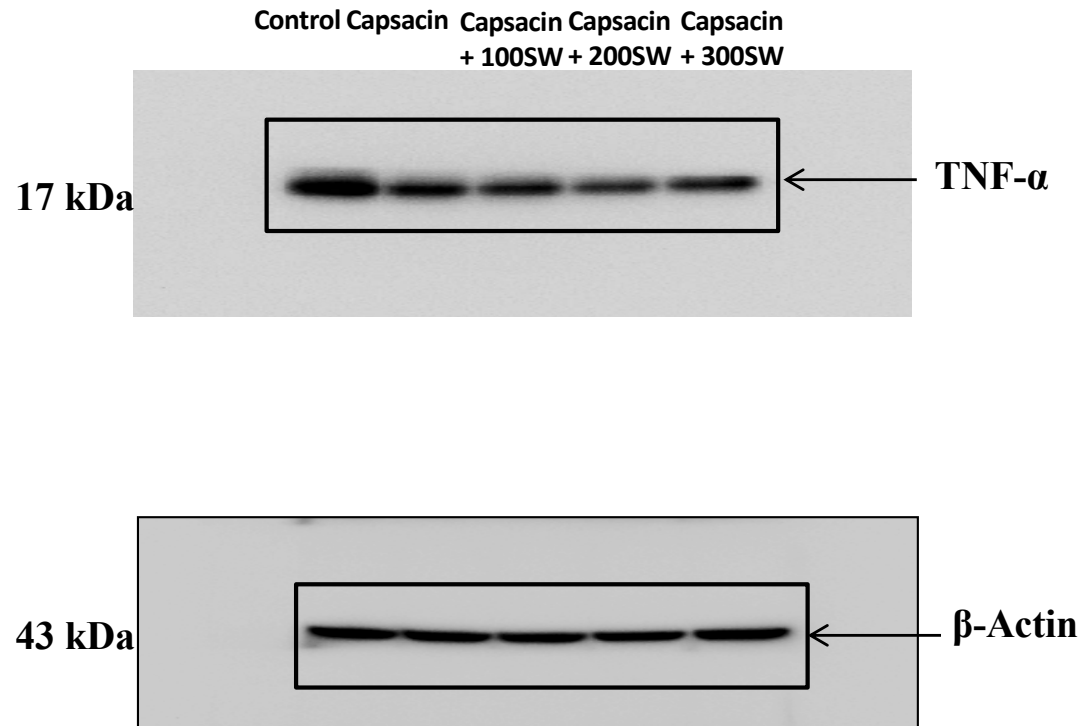

Supplementary figure S1b. Original blots for figure 4

## Western blot of prostate tissue extract expression at 3-day

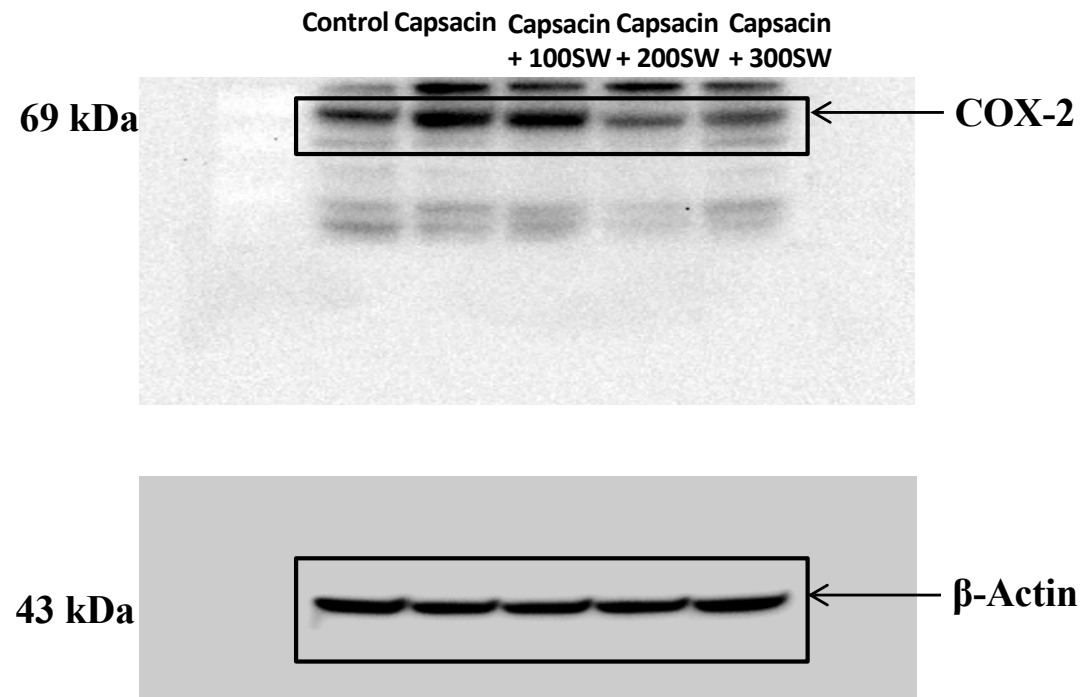

Supplementary figure S1c. Original blots for figure 4

## Western blot of prostate tissue extract expression at 3-day

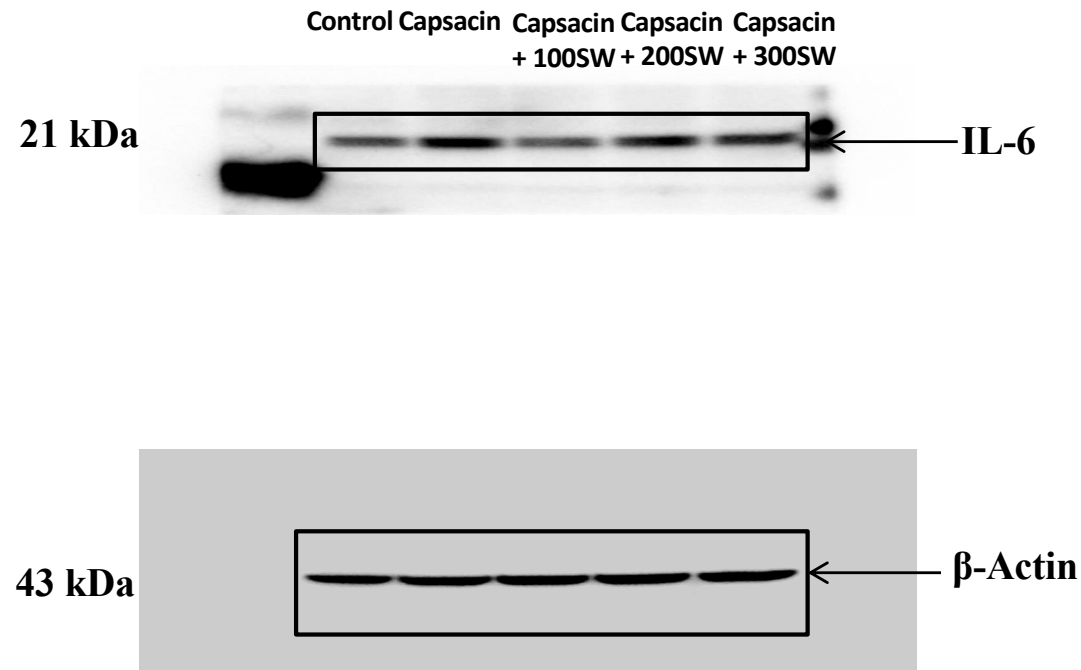

Supplementary figure S1d. Original blots for figure 4

## Western blot of prostate tissue extract expression at 3-day

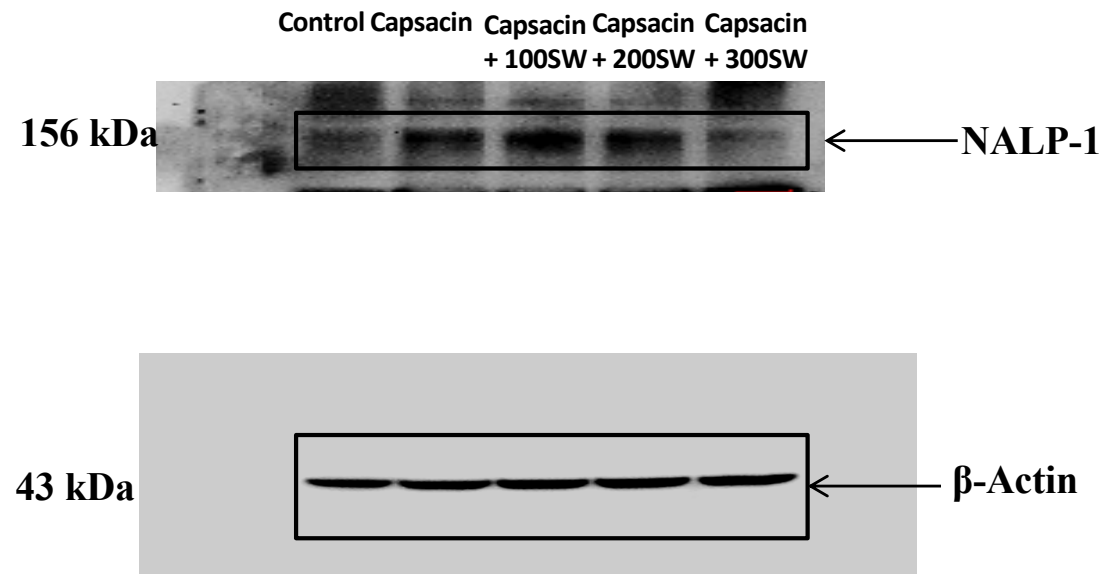

Supplementary figure S1e. Original blots for figure 4

## Western blot of prostate tissue extract expression at 3-day

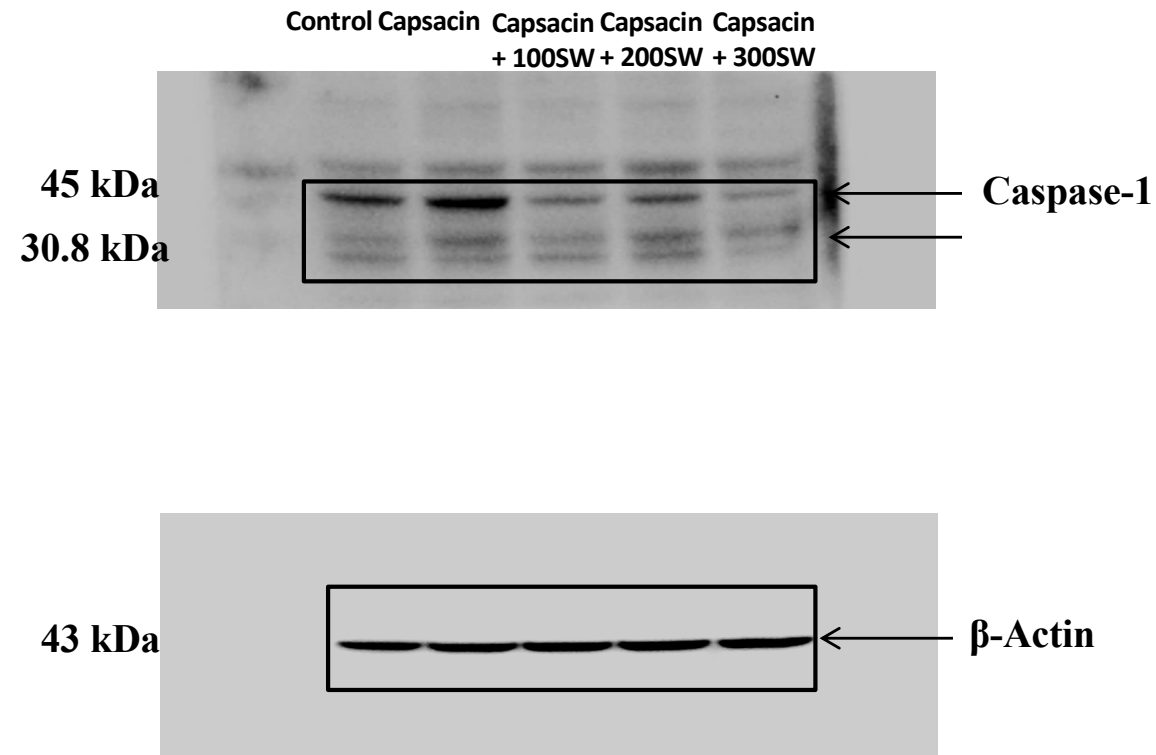

Supplementary figure S1f. Original blots for figure 4

## Western blot of prostate tissue extract expression at 3-day

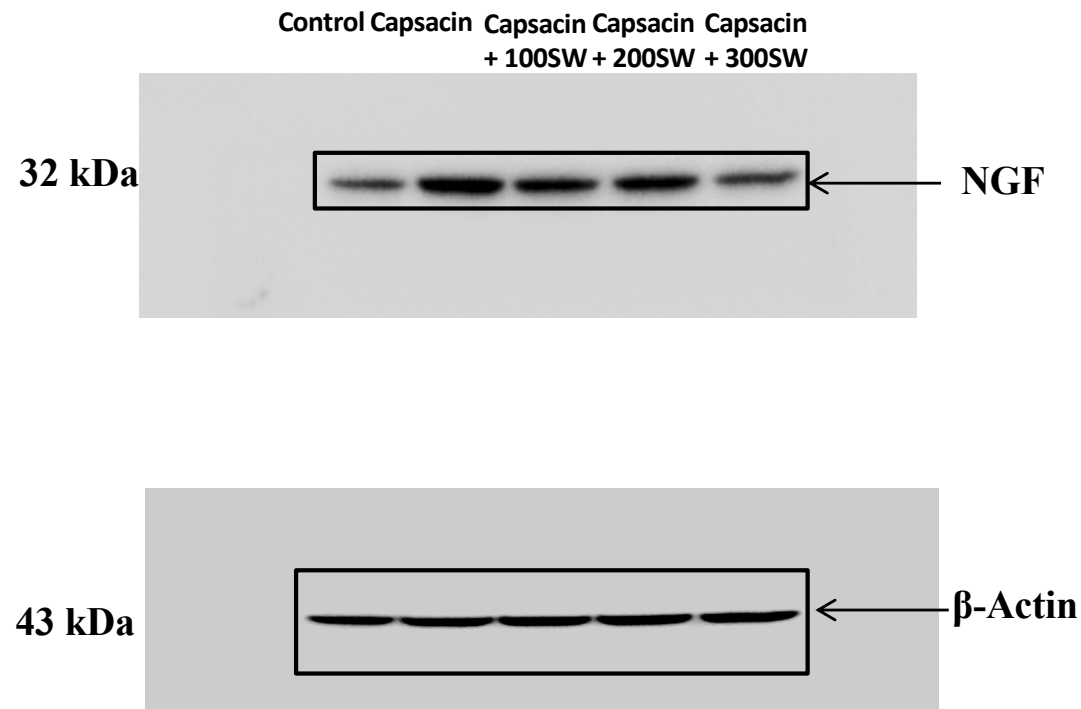

Supplementary figure S1g. Original blots for figure 4



## Western blot of prostate tissue extract expression at 7-day

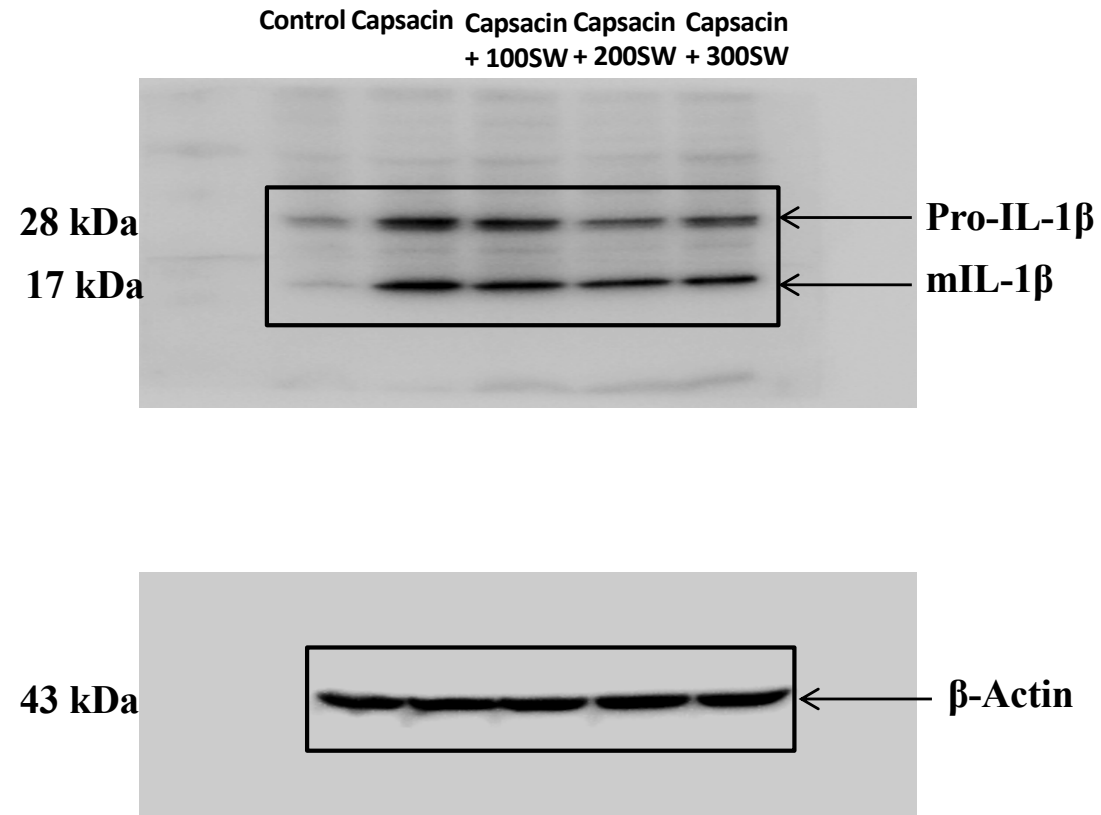

Supplementary figure S2a. Original blots for figure 5

## Western blot of prostate tissue extract expression at 7-day

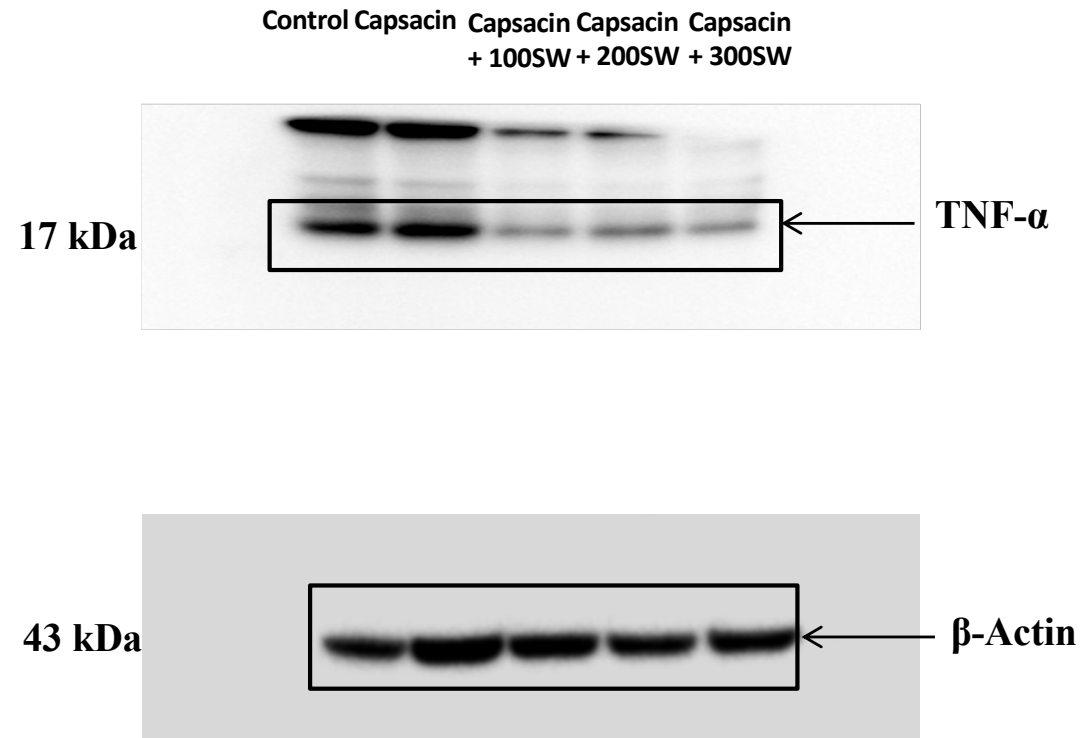

Supplementary figure S2b. Original blots for figure 5

## Western blot of prostate tissue extract expression at 7-day

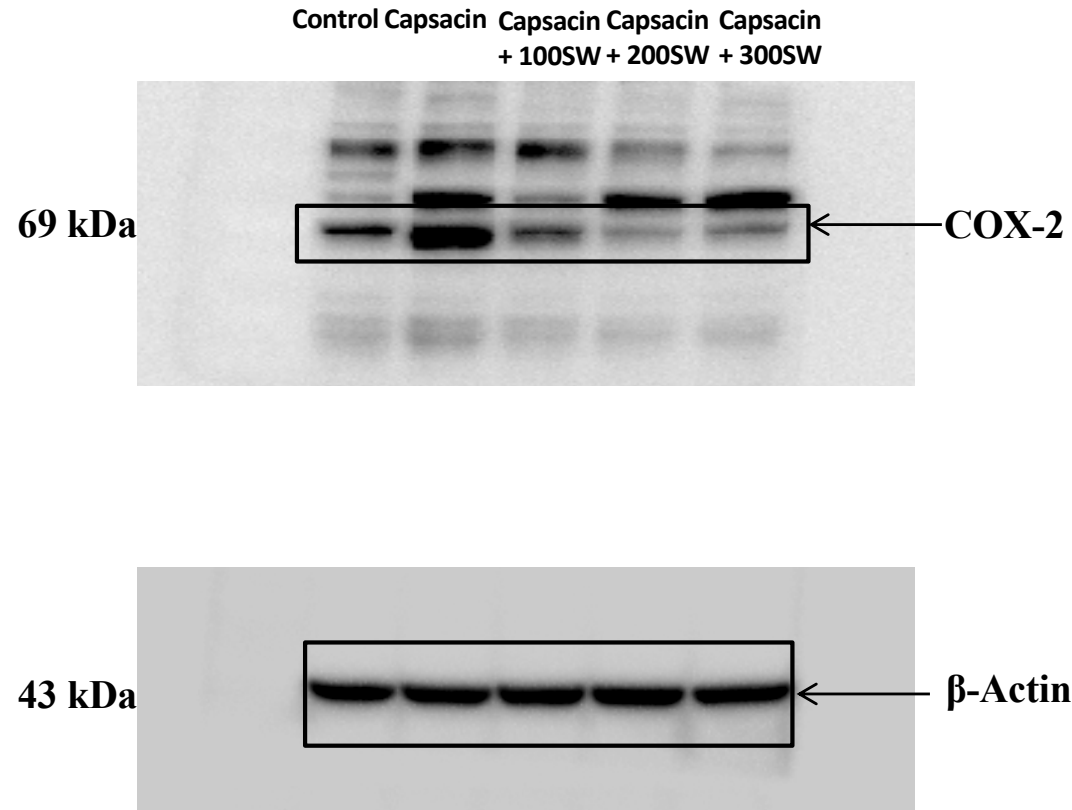

Supplementary figure S2c. Original blots for figure 5

## Western blot of prostate tissue extract expression at 7-day

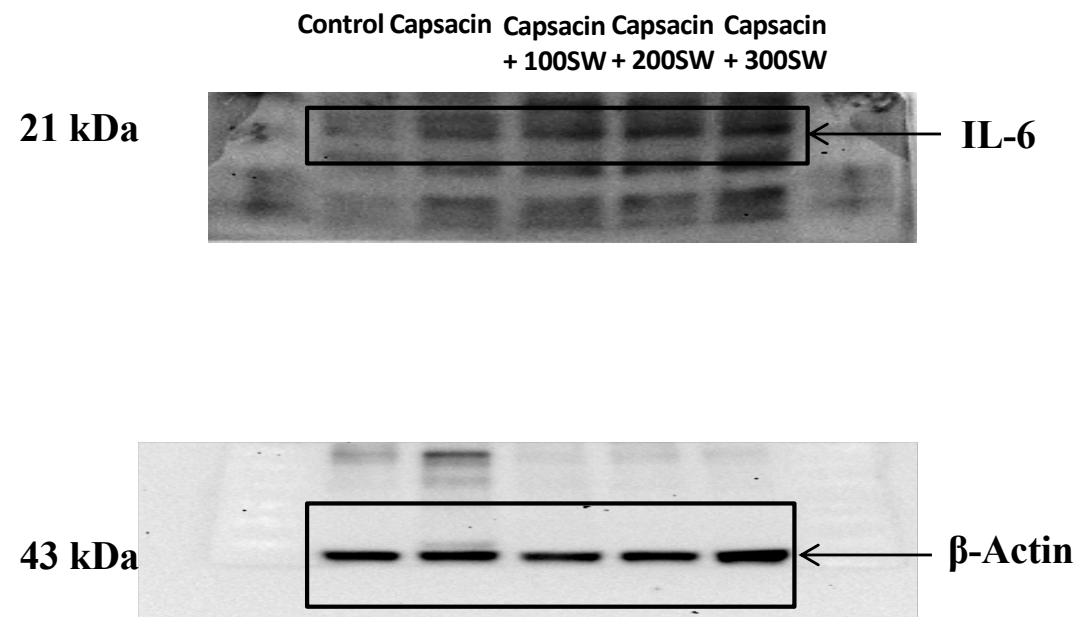

Supplementary figure S2d. Original blots for figure 5

## Western blot of prostate tissue extract expression at 7-day

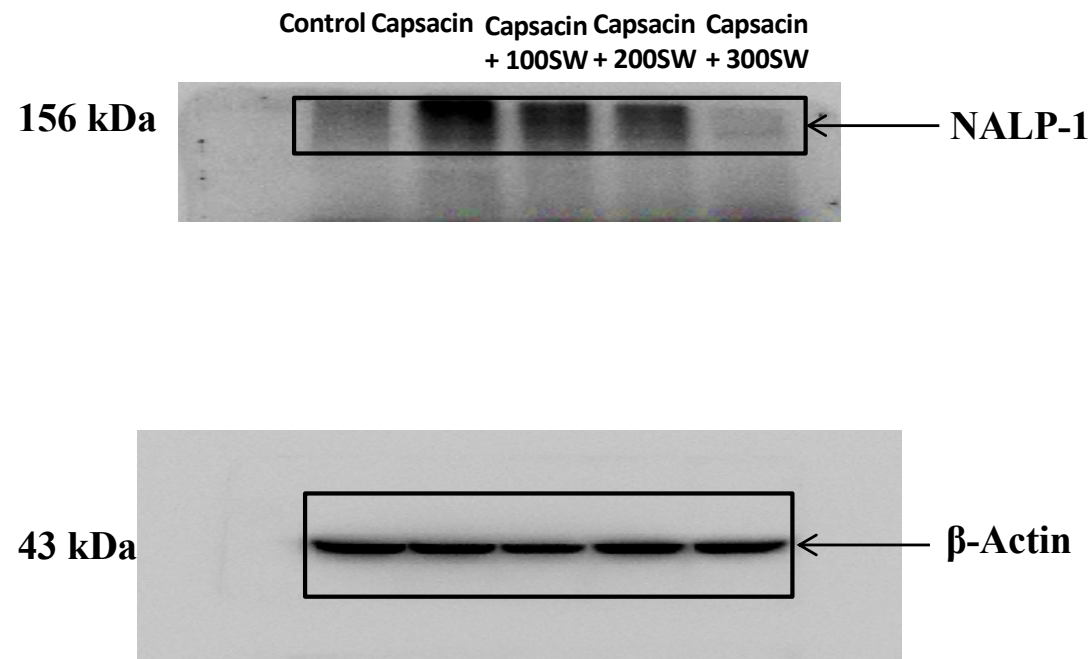

Supplementary figure S2e. Original blots for figure 5

## Western blot of prostate tissue extract expression at 7-day

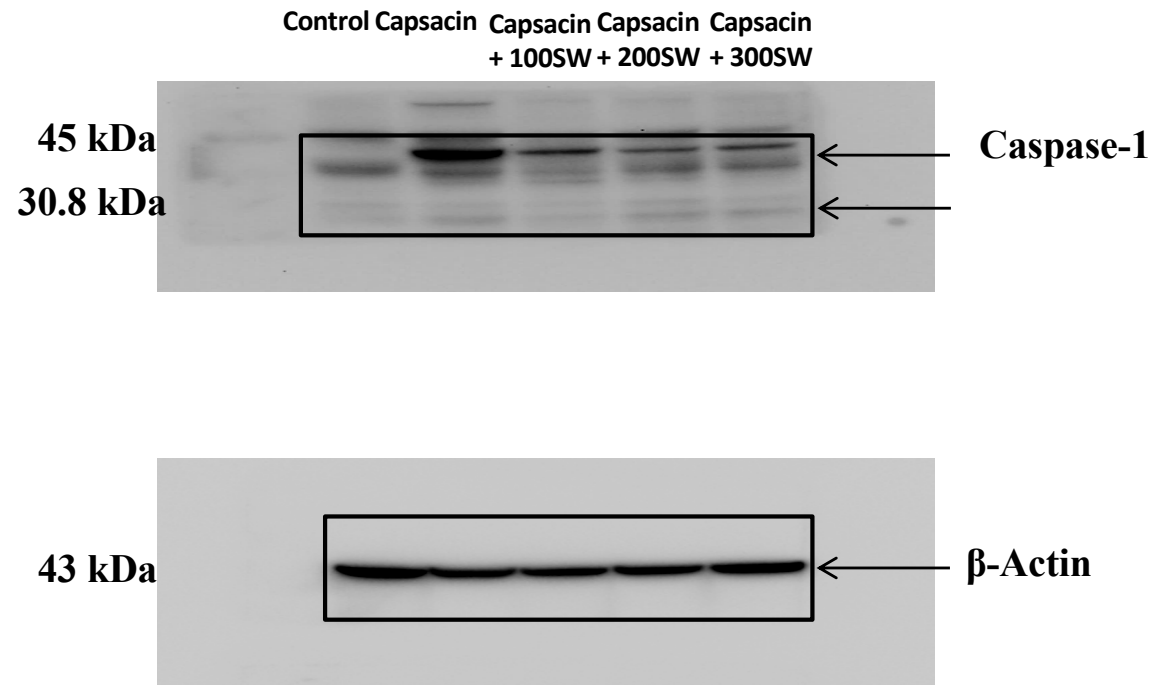

Supplementary figure S2f. Original blots for figure 5

## Western blot of prostate tissue extract expression at 7-day

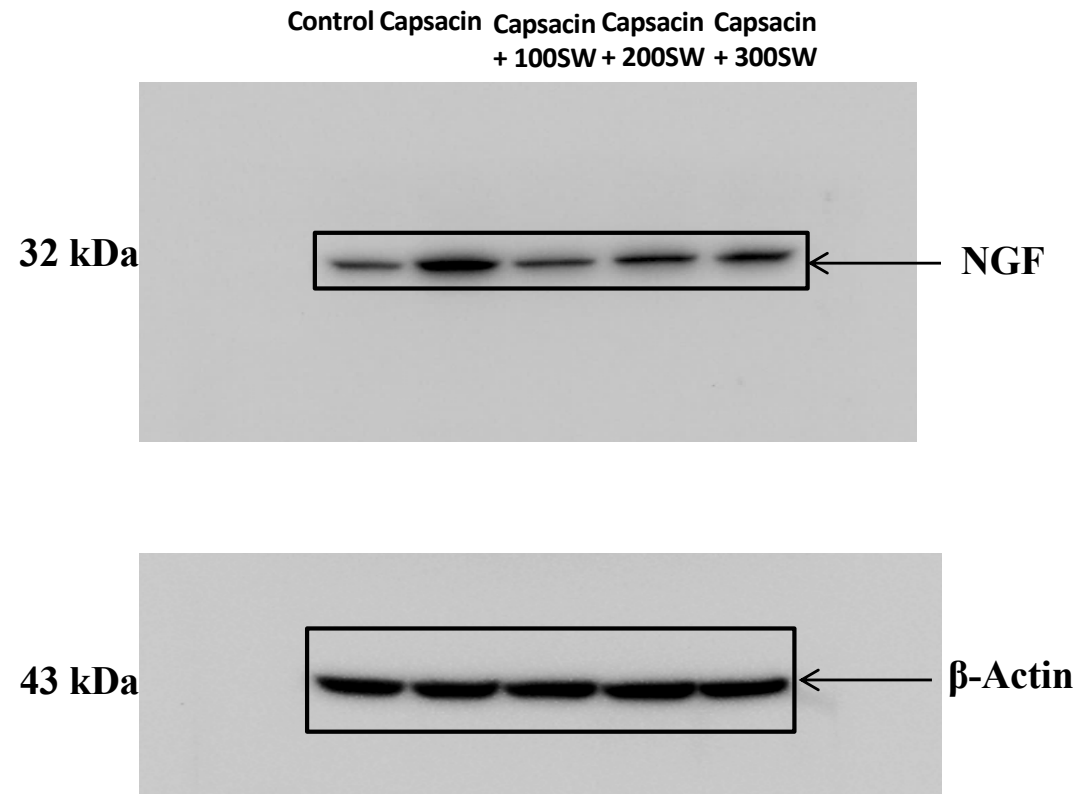

Supplementary figure S2g. Original blots for figure 5
