# Supplementary material for: Low Energy Shock Wave Therapy Inhibits Inflammatory Molecules and Suppresses Prostatic Pain and Hypersensitivity in a Capsaicin Induced Prostatitis Model in Rats
Source: MDPI journal article supplement (doi:10.3390/ijms20194777), 2019-09-26
Supplement: s1 [file s1]

Supplement Table. 1

General characteristics of the experimental animals, n=8 in each group.

|                            | Mean±SEM     |                  |                  |                  |                  |
|----------------------------|--------------|------------------|------------------|------------------|------------------|
|                            | Sham control | Capsaicin (Cap.) | Cap.+LESW<br>100 | Cap.+LESW<br>200 | Cap.+LESW<br>300 |
| <b>Day 3</b>               |              |                  |                  |                  |                  |
| Body wt (gm), day 0        | 301.82±8.49  | 320.96±9.94      | 345.94±15.81     | 343.23±12.14     | 343.51±14.66     |
| Body wt (gm), day 3        | 306.55±8.72  | 325.57±9.74      | 349.00±14.17     | 344.62±11.97     | 344.70±13.86     |
| Difference of body wt (gm) | 4.730±1.65   | 4.61±1.64        | 3.06±2.88        | 1.39±1.26        | 1.20±2.13        |
| Prostate wt (mg)           | 330±2.34     | 350±2.35         | 442±3.11         | 419±3.81         | 436±3.11         |
| Prostate wt/Body wt (mg/g) | 1.1±0.06     | 1.1±0.1          | 1.2±0.1          | 1.2±0.1          | 1.2±0.1          |
| <b>Day 7</b>               |              |                  |                  |                  |                  |
| Body wt (gm), day 0        | 322.08±19.32 | 322.78±12.34     | 309.33±14.25     | 311.90±9.06      | 314.84±12.73     |
| Body wt (gm), day 7        | 337.17±18.06 | 343.39±11.29     | 333.87±12.96     | 328.70±8.23      | 333.40±11.52     |
| Difference of body wt (gm) | 15.08±3.19   | 20.61±3.02       | 24.53±3.94       | 16.80±3.21       | 18.56±3.53       |
| Prostate wt (mg)           | 370±3.1      | 390±2.68         | 360±2.1          | 370±2.5          | 340±1.91         |
| Prostate wt/Body wt (mg/g) | 1.1±0.1      | 1.2±0.08         | 1.1±0.08         | 1.13±0.06        | 1.03±0.04        |

The table show general characteristics of the experimental animals. Data presented as the means ± SE of 8 rat/group.
